# Supplementary material for: Comparative Genomic Analysis of Meningitis- and Bacteremia-Causing Pneumococci Identifies a Common Core Genome
Source: PubMed Central journal article supplement (PMC4567637; doi:10.1128/iai.00814-15), 2015-09-10
Supplement: IAI.00814-15_zii999091430so1.pdf [file IAI.00814-15_zii999091430so1.pdf]

## Supporting Information legends

**Figure S1.** Extrapolation of the core genome sizes using the double-exponential model. The data was extrapolated by fitting a double exponential decaying function to evaluate the absolute number of genes in study isolates. The overall core genome reached a minimum of 1427 genes (95% CI 1420 to 1435;  $R^2 = 99.6$ ) when extrapolated to infinity.

**Table S1.** Sequenced isolates used in this study. The sample accession and run accession are given in the first and second columns. The next five columns give the diagnostic lab sample ID followed by details of the patient age, the serotype of the isolate, and the source from which the isolate was obtained (CSF for meningitis and blood for bacteremia). The last column shows the MLST.

**Table S2.** The complete, fully annotated genomes used as references.

**Table S3.** Entire list of the common core genes to the meningitis and bacteremia dataset. Due to redundancy in naming orthologs several gene names and gene identities are provided. All orthologs that belong to the same cluster have the same gene cluster number

**Table S4.** Genome assembly statistics for the sequenced isolates used in this study.

**Figure S1.**

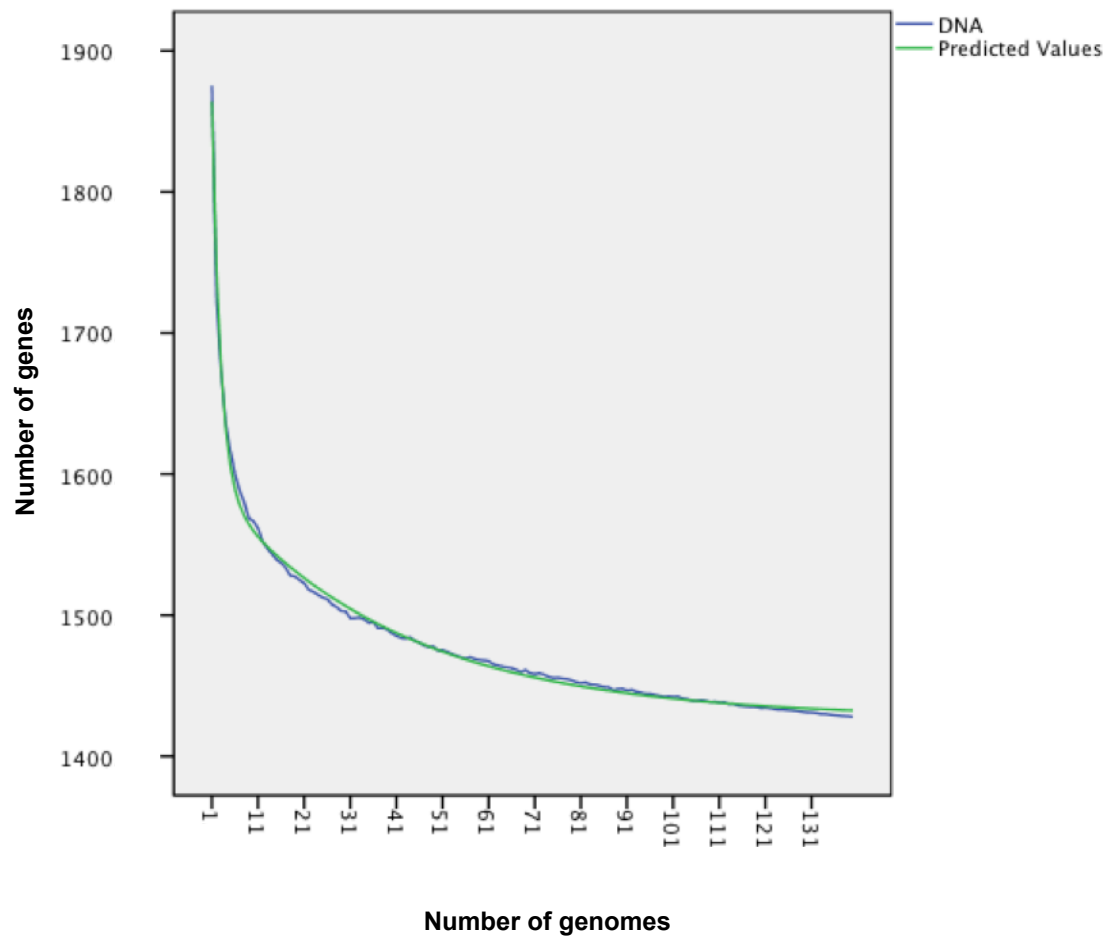

| Estimate |        |         |        |          |
|----------|--------|---------|--------|----------|
| $kc_1$   | $tc_1$ | $kc_2$  | $tc_2$ | gamma    |
| 470.927  | 1.841  | 395.183 | 40.023 | 1427.464 |

Table S1.

| Sample Accession | Run Accession | Sample ID | Individual | Serotype | Source | MLST |
|------------------|---------------|-----------|------------|----------|--------|------|
| ERS005601        | ERR023349     | A32245    | Adult      | 1        | Blood  | 217  |
| ERS005602        | ERR023321     | D31094    | Child      | 1        | Blood  | 217  |
| ERS005613        | ERR023331     | D28368    | Child      | 1        | Blood  | 217  |
| ERS005626        | ERR045783     | D28324    | Child      | 1        | Blood  | 217  |
| ERS005627        | ERR023345     | D36913    | Child      | 1        | Blood  | 217  |
| ERS005633        | ERR045787     | D38050    | Child      | 1        | Blood  | 217  |
| ERS012093        | ERR028422     | A28816    | Adult      | 1        | Blood  | 217  |
| ERS012120        | ERR028438     | A33973    | Adult      | 1        | Blood  | 217  |
| ERS012121        | ERR028439     | A34030    | Adult      | 1        | Blood  | 217  |
| ERS024510        | ERR033122     | D34485    | Child      | 1        | Blood  | 217  |
| ERS050335        | ERR068176     | A31105    | Adult      | 1        | Blood  | 217  |
| ERS050342        | ERR068183     | A31584    | Adult      | 1        | Blood  | 217  |
| ERS050346        | ERR068187     | A32572    | Adult      | 1        | Blood  | 217  |
| ERS050496        | ERR086047     | D35438    | Child      | 1        | Blood  | 217  |
| ERS003569        | ERR023977     | B17099    | Adult      | 1        | CSF    | 217  |
| ERS005597        | ERR023358     | C14599    | Child      | 1        | CSF    | 217  |
| ERS005612        | ERR023330     | C15160    | Child      | 1        | CSF    | 217  |
| ERS005614        | ERR023322     | C14269    | Child      | 1        | CSF    | 217  |
| ERS005620        | ERR023340     | C13632    | Child      | 1        | CSF    | 217  |
| ERS005638        | ERR023337     | B16942    | Adult      | 1        | CSF    | 217  |
| ERS006734        | ERR018021     | C14099    | Child      | 1        | CSF    | 217  |
| ERS006743        | ERR018042     | C16000    | Child      | 1        | CSF    | 217  |
| ERS006745        | ERR018044     | C13215    | Child      | 1        | CSF    | 217  |
| ERS006746        | ERR018034     | C13181    | Child      | 1        | CSF    | 217  |
| ERS006820        | ERR023389     | C14249    | Child      | 1        | CSF    | 217  |
| ERS012073        | ERR028411     | B14935    | Adult      | 1        | CSF    | 217  |
| ERS012088        | ERR028427     | B17333    | Adult      | 1        | CSF    | 217  |
| ERS026047        | ERR033141     | C12907    | Child      | 1        | CSF    | 217  |
| ERS050414        | ERR085965     | B17224    | Adult      | 1        | CSF    | 217  |

|                  |           |        |       |     |       |       |
|------------------|-----------|--------|-------|-----|-------|-------|
| <b>ERS050415</b> | ERR085966 | B17789 | Adult | 1   | CSF   | 217   |
| <b>ERS050416</b> | ERR085967 | B17998 | Adult | 1   | CSF   | 217   |
| <b>ERS050417</b> | ERR085968 | B18042 | Adult | 1   | CSF   | 217   |
| <b>ERS050453</b> | ERR086004 | C12797 | Child | 1   | CSF   | 217   |
| <b>ERS003550</b> | ERR023964 | A33056 | Adult | 1   | Blood | 303   |
| <b>ERS006824</b> | ERR023393 | C11020 | Child | 1   | CSF   | 303   |
| <b>ERS005629</b> | ERR045786 | D28572 | Child | 1   | Blood | 8158  |
| <b>ERS005590</b> | ERR023352 | A31470 | Adult | 1   | Blood | Novel |
| <b>ERS005618</b> | ERR023338 | D33216 | Child | 1   | Blood | Novel |
| <b>ERS012122</b> | ERR028440 | A34045 | Adult | 1   | Blood | Novel |
| <b>ERS050334</b> | ERR068175 | A30992 | Adult | 1   | Blood | Novel |
| <b>ERS050494</b> | ERR086045 | D27102 | Child | 1   | Blood | Novel |
| <b>ERS003575</b> | ERR023983 | B15567 | Adult | 1   | CSF   | Novel |
| <b>ERS005594</b> | ERR023348 | C11680 | Child | 1   | CSF   | Novel |
| <b>ERS005598</b> | ERR023357 | B13691 | Adult | 1   | CSF   | Novel |
| <b>ERS005603</b> | ERR023326 | C12458 | Child | 1   | CSF   | Novel |
| <b>ERS005611</b> | ERR023329 | B10261 | Adult | 1   | CSF   | Novel |
| <b>ERS005615</b> | ERR023323 | B10454 | Adult | 1   | CSF   | Novel |
| <b>ERS005624</b> | ERR023343 | C14737 | Child | 1   | CSF   | Novel |
| <b>ERS008357</b> | ERR024531 | C15514 | Child | 1   | CSF   | Novel |
| <b>ERS006727</b> | ERR018025 | D31621 | Child | 10B | Blood | 705   |
| <b>ERS012094</b> | ERR026611 | A29037 | Adult | 10B | Blood | 7055  |
| <b>ERS008345</b> | ERR024523 | B14457 | Adult | 10B | CSF   | 7055  |
| <b>ERS012087</b> | ERR028426 | B16827 | Adult | 10B | CSF   | 7055  |
| <b>ERS026044</b> | ERR033144 | C11367 | Child | 10B | CSF   | 7055  |
| <b>ERS050418</b> | ERR085969 | B18107 | Adult | 10B | CSF   | 7055  |
| <b>ERS012097</b> | ERR026616 | A29943 | Adult | 12B | Blood | 989   |
| <b>ERS012099</b> | ERR026618 | A31131 | Adult | 12B | Blood | 989   |
| <b>ERS003564</b> | Novel     | B15071 | Adult | 12B | CSF   | 989   |
| <b>ERS012076</b> | ERR028414 | B15249 | Adult | 12B | CSF   | 989   |
| <b>ERS026056</b> | ERR033118 | C15284 | Child | 12B | CSF   | 989   |
| <b>ERS003548</b> | ERR023966 | B13048 | Adult | 12B | CSF   | Novel |
| <b>ERS006804</b> | ERR018108 | B16221 | Adult | 12B | CSF   | Novel |
| <b>ERS050457</b> | ERR086008 | C14971 | Child | 12B | CSF   | Novel |
| <b>ERS050338</b> | ERR068179 | A31198 | Adult | 12F | Blood | 989   |

|                  |           |        |       |       |       |       |
|------------------|-----------|--------|-------|-------|-------|-------|
| <b>ERS006802</b> | ERR018106 | B17731 | Adult | 12F   | CSF   | 989   |
| <b>ERS012086</b> | ERR028425 | B16392 | Adult | 13    | CSF   | 2053  |
| <b>ERS050456</b> | ERR086007 | C14277 | Child | 13    | CSF   | 2053  |
| <b>ERS005609</b> | ERR023327 | D28370 | Child | 13    | Blood | 5647  |
| <b>ERS026043</b> | ERR033145 | D32344 | Child | 13    | Blood | Novel |
| <b>ERS006736</b> | ERR018037 | D25696 | Child | 14    | Blood | 63    |
| <b>ERS012092</b> | ERR028421 | A28640 | Adult | 14    | Blood | 63    |
| <b>ERS050495</b> | ERR086046 | D27950 | Child | 15A   | Blood | Novel |
| <b>ERS012102</b> | ERR026621 | B10622 | Adult | 15C   | CSF   | Novel |
| <b>ERS012142</b> | ERR028461 | D30716 | Child | 16F   | Blood | 705   |
| <b>ERS026050</b> | ERR033138 | D37909 | Child | 16F   | Blood | 705   |
| <b>ERS006818</b> | ERR023387 | D28531 | Child | 18A   | Blood | Novel |
| <b>ERS012113</b> | ERR026633 | D28166 | Child | 18B   | Blood | 102   |
| <b>ERS024520</b> | ERR033126 | C10281 | Child | 18B   | CSF   | 102   |
| <b>ERS026048</b> | ERR033140 | C13260 | Child | 18B   | CSF   | Novel |
| <b>ERS008361</b> | ERR024535 | D33733 | Child | 18F   | Blood | Novel |
| <b>ERS050452</b> | ERR086003 | C12675 | Child | 18F   | CSF   | Novel |
| <b>ERS050341</b> | ERR068182 | A31361 | Adult | 19A   | Blood | 2062  |
| <b>ERS050340</b> | ERR068181 | A31349 | Adult | 19A   | Blood | Novel |
| <b>ERS026040</b> | ERR033137 | D32289 | Child | 19F   | Blood | Novel |
| <b>ERS006738</b> | ERR018036 | D26316 | Child | 23F   | Blood | 802   |
| <b>ERS012116</b> | ERR028432 | A33308 | Adult | 23F   | Blood | 802   |
| <b>ERS012141</b> | ERR028460 | D30625 | Child | 23F   | Blood | 802   |
| <b>ERS012075</b> | ERR028413 | B15188 | Adult | 23F   | CSF   | 802   |
| <b>ERS026058</b> | ERR033116 | C15291 | Child | 23F   | CSF   | 802   |
| <b>ERS050420</b> | ERR085971 | B18340 | Adult | 23F   | CSF   | 802   |
| <b>ERS008320</b> | ERR024496 | A32273 | Adult | 23F   | Blood | Novel |
| <b>ERS050343</b> | ERR068184 | A31918 | Adult | 23F   | Blood | Novel |
| <b>ERS008335</b> | ERR024512 | B10366 | Adult | 23F   | CSF   | Novel |
| <b>ERS050345</b> | ERR068186 | A32497 | Adult | 24F   | Blood | 5077  |
| <b>ERS050454</b> | ERR086005 | C12879 | Child | 24F   | CSF   | 5077  |
| <b>ERS050333</b> | ERR068174 | A29265 | Adult | 24F   | Blood | Novel |
| <b>ERS006733</b> | ERR018031 | D38094 | Child | 25F   | Blood | 2902  |
| <b>ERS012112</b> | ERR026632 | D24847 | Child | 25F   | Blood | 2987  |
| <b>ERS006732</b> | ERR018030 | C14376 | Child | 25F/A | CSF   | Novel |

|                  |           |        |       |     |       |       |
|------------------|-----------|--------|-------|-----|-------|-------|
| <b>ERS026041</b> | ERR033136 | D36881 | Child | 3   | Blood | 700   |
| <b>ERS050433</b> | ERR085984 | B20605 | Adult | 3   | CSF   | 700   |
| <b>ERS008359</b> | ERR024533 | D31827 | Child | 34  | Blood | Novel |
| <b>ERS050339</b> | ERR068180 | A31265 | Adult | 35B | Blood | 5396  |
| <b>ERS012071</b> | ERR028398 | B14721 | Adult | 35B | CSF   | 5396  |
| <b>ERS012119</b> | ERR028437 | A33922 | Adult | 4   | Blood | 2213  |
| <b>ERS050344</b> | ERR068185 | A32279 | Adult | 4   | Blood | 2213  |
| <b>ERS006737</b> | ERR018035 | C14560 | Child | 4   | CSF   | 5483  |
| <b>ERS003574</b> | ERR023982 | B15467 | Adult | 45  | CSF   | Novel |
| <b>ERS050419</b> | ERR085970 | B18210 | Adult | 45  | CSF   | Novel |
| <b>ERS012095</b> | ERR026614 | A29101 | Adult | 5   | Blood | 289   |
| <b>ERS050641</b> | ERR085862 | D48490 | Child | 5   | Blood | 289   |
| <b>ERS003576</b> | ERR023984 | B16728 | Adult | 5   | CSF   | 289   |
| <b>ERS006744</b> | ERR018043 | C15085 | Child | 5   | CSF   | 289   |
| <b>ERS050646</b> | ERR085867 | D55377 | Child | 5   | Blood | Novel |
| <b>ERS008360</b> | ERR024534 | D33293 | Child | 6A  | Blood | 2987  |
| <b>ERS008351</b> | ERR024529 | C11950 | Child | 6A  | CSF   | 2987  |
| <b>ERS008352</b> | ERR024519 | C12495 | Child | 6A  | CSF   | 2987  |
| <b>ERS012078</b> | ERR028416 | C14215 | Child | 6A  | CSF   | 2987  |
| <b>ERS008347</b> | ERR024525 | B16242 | Adult | 6A  | CSF   | 5412  |
| <b>ERS012145</b> | ERR028464 | D36051 | Child | 6A  | Blood | Novel |
| <b>ERS026049</b> | ERR033139 | D36355 | Child | 6B  | Blood | 2285  |
| <b>ERS003549</b> | ERR023967 | A33096 | Adult | 6B  | Blood | Novel |
| <b>ERS012143</b> | ERR028462 | D33275 | Child | 6B  | Blood | Novel |
| <b>ERS050336</b> | ERR068177 | A31122 | Adult | 6B  | Blood | Novel |
| <b>ERS050451</b> | ERR086002 | C12480 | Child | 6B  | CSF   | Novel |
| <b>ERS012083</b> | ERR028420 | B15901 | Adult | 6C  | CSF   | 2902  |
| <b>ERS050441</b> | ERR085992 | B21980 | Adult | 6D  | CSF   | 2902  |
| <b>ERS012079</b> | ERR028417 | D38023 | Child | 6D  | Blood | Novel |
| <b>ERS050428</b> | ERR085979 | B19805 | Adult | 7F  | CSF   | Novel |
| <b>ERS050347</b> | ERR068188 | A32849 | Adult | 7f  | Blood | Novel |
| <b>ERS012124</b> | ERR028442 | A34562 | Adult | 9A  | Blood | 1871  |
| <b>ERS024518</b> | ERR033128 | C10300 | Child | 9A  | CSF   | 1871  |
| <b>ERS012123</b> | ERR028441 | A34292 | Adult | 9A  | Blood | 5778  |
| <b>ERS012096</b> | ERR026615 | A29167 | Adult | 9A  | Blood | 5902  |

|                  |           |        |       |    |       |       |
|------------------|-----------|--------|-------|----|-------|-------|
| <b>ERS012098</b> | ERR026617 | A30277 | Adult | 9A | Blood | 5902  |
| <b>ERS012100</b> | ERR026619 | B10027 | Adult | 9A | CSF   | 5902  |
| <b>ERS012117</b> | ERR028435 | A33813 | Adult | 9A | Blood | Novel |
| <b>ERS024513</b> | ERR033133 | D30974 | Child | 9A | Blood | Novel |
| <b>ERS050409</b> | ERR085960 | B10199 | Adult | 9L | CSF   | Novel |
| <b>ERS050455</b> | ERR086006 | C14257 | Child | 9L | CSF   | Novel |

Table S2.

| Genome no. | GenBank accession number | Other name    | Serotype | Sequencing centre               | Year | Reference                                                       |
|------------|--------------------------|---------------|----------|---------------------------------|------|-----------------------------------------------------------------|
| 1          | AE005672                 | TIGR4         | 4        | TIGR                            | 2001 | Tettelin H et al. Science 293 (5529):498-506 (2001)             |
| 2          | AE007317                 | R6            | NT       | Eli Lilly and Company           | 2001 | Hoskins J et al. J Bacteriol 183(19), 5709-5717, 2001           |
| 3          | CP000410                 | D39           | 2        | TIGR                            | 2004 | Lanie J.A et al. J Bacteriol 189(1), 38-51, 2007                |
| 4          | CP000936                 | Hungary 19A-6 | 19A      | J. Craig Venter Institute       | 2008 | Hotopp,J.D. et al. Direct submission. J. Craig Venter Institute |
| 5          | CP001015                 | G54           | 19F      | Institute for Genome Sciences   | 2008 | Dopazo J et al. Microb Drug Resist 7(2), 99-125, 2001           |
| 6          | CP001033                 | CGSP14        | 14       | Beijing institute of Genomics   | 2008 | Ding F et al. BMC Genomics 10, 158, 2009                        |
| 7          | CP000918                 | 70585         | 5        | J. Craig Venter Institute       | 2009 | Hotopp,J.D. et al. Direct submission. J. Craig Venter Institute |
| 8          | CP000919                 | JJA           | 14       | J. Craig Venter Institute       | 2009 | Hotopp,J.D. et al. Direct submission. J. Craig Venter Institute |
| 9          | CP000920                 | P1031         | 1        | J. Craig Venter Institute       | 2009 | Hotopp,J.D. et al. Direct submission. J. Craig Venter Institute |
| 10         | CP000921                 | Taiwan 19F-14 | 19F      | J. Craig Venter Institute       | 2009 | Hotopp,J.D. et al. Direct submission. J. Craig Venter Institute |
| 11         | FM211187                 | ATCC700669    | 23F      | Wellcome Trust Sanger Institute | 2009 | Croucher N.J. et al. J Bacteriol 191(5), 1480-1489, 2009        |
| 12         | CP001993                 | 670           | 6B       | Baylor College of Medicine      | 2010 | Muzny,D.M. et al. Direct submission. Baylor College of Medicine |
